# Supplementary material
Source: MDPI journal article supplement (https://www.mdpi.com/2071-1050/12/9/3708)
Supplement: s1 [file s1]

**Table S1.** ISO 37120 Indicators, Types, Functions, and Relevance to Arctic Cities.

| Sustainability domain                                                                                              | ISO indicator type | Indicator function | Relevance to Arctic cities | Notes                                                                   |
|--------------------------------------------------------------------------------------------------------------------|--------------------|--------------------|----------------------------|-------------------------------------------------------------------------|
| <b>Economy</b>                                                                                                     |                    |                    |                            |                                                                         |
| 5.1 Unemployment rate                                                                                              | core               | outcome            | Low                        | Current employment may depend on non-renewable resource extraction      |
| 5.2 Assessed value of commercial and industrial properties as percentage of total assessed value of all properties | supporting         | capacity           | Low                        | Ignores role of arctic regional economy in city's economy               |
| 5.3 Percentage of persons in full-time employment                                                                  | supporting         | outcome            | Revise                     | Exclude employment based on non-renewable resource extraction           |
| 5.4 Youth unemployment rate                                                                                        | supporting         | outcome            | Relevant                   | Current employment may depend on non-renewable resource extraction      |
| 5.5 Number of businesses per 100 000 population                                                                    | supporting         | capacity           | Revise                     | Ignores role of arctic regional economy in city's economy               |
| 5.6 Number of new patents per 100 000 population per year                                                          | supporting         | investment         | Low                        | Ignores role of arctic regional economy in city's economy               |
| 5.7 Annual number of visitor overnight stays per 100,000                                                           | supporting         | outcome            | Relevant                   |                                                                         |
| 5.8 Number of non-stop commercial air destinations                                                                 | supporting         | capacity           | Relevant                   |                                                                         |
| 5.9.1 Average household income in \$US                                                                             | profile            |                    | Revise                     | Subtract income from nonrenewable sources                               |
| 5.9.2 Annual inflation rate based on average of the past five years                                                | profile            |                    | Relevant                   |                                                                         |
| 5.9.3 City product per capita, \$US                                                                                | profile            |                    | Revise                     | Per capita product excluding product derived from non-renewable sources |
| <b>Education</b>                                                                                                   |                    |                    |                            |                                                                         |
| 6.1 Percentage of female school-aged population enrolled in schools                                                | core               | investment         | Relevant                   |                                                                         |
| 6.2 Percentage of students completing primary education: survival rate                                             | core               | investment         | Relevant                   |                                                                         |
| 6.3 Percentage of students completing secondary education: survival rate                                           | core               | investment         | Relevant                   |                                                                         |
| 6.4 Primary education student teacher ratio                                                                        | core               | investment         | Relevant                   |                                                                         |
| 6.5 Percentage of school-aged population enrolled in schools                                                       | supporting         | investment         | Relevant                   |                                                                         |
| 6.6 Number of higher education degrees per 100 000 population                                                      | supporting         | capacity           | Relevant                   |                                                                         |

|                                                                                                 |            |            |          |                                                                          |
|-------------------------------------------------------------------------------------------------|------------|------------|----------|--------------------------------------------------------------------------|
| <b>Energy</b>                                                                                   |            |            |          |                                                                          |
| 7.1 Total end-use energy consumption per capita, GJ/year                                        | core       | outcome    | Revise   | Adjust for HDD                                                           |
| 7.2 Percentage of total end-use energy derived from renewable sources                           | core       | outcome    | Relevant |                                                                          |
| 7.3 Percentage of city population with authorized residential electrical service                | core       | outcome    | Relevant |                                                                          |
| 7.4 Number of gas distribution service connections per 100 000 population                       | core       | outcome    | Relevant |                                                                          |
| 7.5 Annual energy consumption of public buildings per year, GJ/m2                               | core       | outcome    | Revise   | Adjust for HDD                                                           |
| 7.6 Electricity consumption of public street lighting per kilometre of lighted street, kwh/year | supporting | outcome    | Revise   | During winter season (Sep.-March)                                        |
| 7.7 Average annual hours of electrical service interruptions per household                      | supporting | outcome    | Relevant |                                                                          |
| 7.8.1 Heating degree days                                                                       | profile    |            | Relevant |                                                                          |
| 7.8.2 Cooling degree days                                                                       | profile    |            | Low      | replace with solar energy potential                                      |
| <b>Environment and Climate Change</b>                                                           |            |            |          |                                                                          |
| 8.1 Fine particulate matter (PM2.5) concentration                                               | core       | outcome    | Relevant |                                                                          |
| 8.2 Particulate matter (PM10) concentration                                                     | core       | outcome    | Relevant |                                                                          |
| 8.3 Greenhouse gas emissions measured in tonnes per capita                                      | core       | investment | Relevant |                                                                          |
| 8.4 Percentage of areas designated for natural protection                                       | supporting | investment | Low      | Difficult to define for city surrounded by lightly settled areas         |
| 8.5 NO2 (nitrogen dioxide) concentration                                                        | supporting | outcome    | Relevant |                                                                          |
| 8.6 SO2 (sulfur dioxide) concentration                                                          | supporting | outcome    | Relevant |                                                                          |
| 8.7 O3 (ozone) concentration                                                                    | supporting | outcome    | Revise   | Replace with Carbon monoxide (CO)                                        |
| 8.8 Noise pollution                                                                             | supporting | outcome    | Relevant |                                                                          |
| 8.9 Percentage change in number of native species                                               | supporting | investment | Revise   | Number of invasive species a bigger problem for Arctic cities            |
| <b>Finance</b>                                                                                  |            |            |          |                                                                          |
| 9.1 Debt service ratio of municipal locally raised revenue                                      | core       | capacity   | Relevant |                                                                          |
| 9.2 Capital spending as a percentage of total expenditures                                      | core       | investment | Relevant |                                                                          |
| 9.3 Own-source revenue as a percentage of total revenues                                        | supporting | capacity   | Relevant | Add percentage of municipal revenue derived from non-renewable resources |

|                                                                                                   |            |            |          |
|---------------------------------------------------------------------------------------------------|------------|------------|----------|
| 9.4 Tax collected as a percentage of tax billed                                                   | supporting | outcome    | Relevant |
| 9.5.1 Gross operating budget per capita                                                           | profile    |            | Relevant |
| 9.5.2 Gross capital budget per capita                                                             | profile    |            | Relevant |
| <b>Governance</b>                                                                                 |            |            |          |
| 10.1 Women as a percentage of total elected to city-level office                                  | core       | outcome    | Relevant |
| 10.2 Number of convictions for corruption and/or bribery by city officials per 100 000 population | supporting | outcome    | Relevant |
| 10.3 Number of registered voters as a percentage of the voting age population                     | supporting | investment | Relevant |
| 10.4 Voter participation in last municipal election                                               | supporting | investment | Relevant |
| <b>Health</b>                                                                                     |            |            |          |
| 11.1 Average life expectancy                                                                      | core       | outcome    | Relevant |
| 11.2 Number of in-patient hospital beds per 100 000 population                                    | core       | capacity   | Relevant |
| 11.3 Number of physicians per 100 000 population                                                  | core       | capacity   | Relevant |
| 11.4 Under age five mortality per 1 000 live births                                               | core       | outcome    | Relevant |
| 11.5 Number of nursing and mid-wifery personnel per 100 000 population                            | supporting | capacity   | Relevant |
| 11.6 Suicide rate per 100 000 population                                                          | supporting | outcome    | Relevant |
| <b>Housing</b>                                                                                    |            |            |          |
| 12.1 Percentage of city population living in inadequate housing                                   | core       | capacity   | Relevant |
| 12.2 Percentage of population living in affordable housing                                        | core       | outcome    | Relevant |
| 12.3 Number of homeless per 100 000 population                                                    | supporting | outcome    | Relevant |
| 12.4 Percentage of households that exist without registered legal titles                          | supporting | outcome    | Relevant |
| 12.5.1 Total number of households                                                                 | profile    |            | Relevant |
| 12.5.2 Persons per unit                                                                           | profile    |            | Relevant |
| 12.5.3 Residential vacancy rate                                                                   | profile    |            | Relevant |
| 12.5.4 Living space (m2/person)                                                                   | profile    |            | Relevant |
| 12.5.5 Secondary residence rate                                                                   | profile    |            | Relevant |
| 12.5.6 Residential rental dwelling units as a percentage of total dwelling units                  | profile    |            | Relevant |
| <b>Population and Social Conditions</b>                                                           |            |            |          |

|                                                                                |            |          |          |                                                                           |
|--------------------------------------------------------------------------------|------------|----------|----------|---------------------------------------------------------------------------|
| 13.1 Percentage of city population living below the international poverty line | core       | outcome  | Relevant |                                                                           |
| 13.2 Percentage of city population living below the national poverty line      | supporting | outcome  | Relevant |                                                                           |
| 13.3 Gini coefficient of inequality                                            | supporting | outcome  | Relevant |                                                                           |
| 13.4.1 Annual population change                                                | profile    |          | Relevant |                                                                           |
| 13.4.2 Percentage of population that are foreign born                          | profile    |          | Relevant |                                                                           |
| 13.4.3 Population demographics                                                 | profile    |          | Relevant |                                                                           |
| 13.4.4 Percentage of population that are new immigrants                        | profile    |          | Relevant |                                                                           |
| 13.4.5 Percentage of city population that are non-citizens                     | profile    |          | Relevant |                                                                           |
| 13.4.6 Number of university students per 100 000 population                    | profile    |          | Relevant |                                                                           |
| <b>Recreation</b>                                                              |            |          |          |                                                                           |
| 14.1 Square metres of public indoor recreation space per capita                | supporting | capacity | Relevant |                                                                           |
| 14.2 Square metres of public outdoor recreation space per capita               | supporting | capacity | Low      | Difficult to define for Arctic cities surrounded by lightly settled lands |
| <b>Safety</b>                                                                  |            |          |          |                                                                           |
| 15.1 Number of firefighters per 100 000 population                             | core       | capacity | Relevant |                                                                           |
| 15.2 Number of fire-related deaths per 100 000 population                      | core       | outcome  | Relevant |                                                                           |
| 15.3 Number of natural-hazard-related deaths per 100 000 population            | core       | outcome  | Relevant |                                                                           |
| 15.4 Number of police officers per 100 000 population                          | core       | capacity | Relevant |                                                                           |
| 15.5. Number of homicides per 100 000 population                               | core       | outcome  | Relevant |                                                                           |
| 15.6 Number of volunteer and part-time firefighters per 100 000 population     | supporting | capacity | Relevant |                                                                           |
| 15.7 Response time for emergency response services from initial call           | supporting | outcome  | Relevant |                                                                           |
| 15.8 Crimes against property per 100 000 population                            | supporting | outcome  | Relevant |                                                                           |
| 15.9 Number of deaths caused by industrial accidents per 100 000 population    | supporting | outcome  | Relevant |                                                                           |
| 15.10 Number of violent crimes against women per 100 000 population            | core       | outcome  | Relevant |                                                                           |
| <b>Solid Waste</b>                                                             |            |          |          |                                                                           |
| 16.1 Percentage of city population with regular solid waste collection         | core       | capacity | Relevant |                                                                           |

|                                                                                                                        |            |            |          |                                                                      |
|------------------------------------------------------------------------------------------------------------------------|------------|------------|----------|----------------------------------------------------------------------|
| 16.2 Total collected municipal solid waste per capita                                                                  | core       | outcome    | Relevant |                                                                      |
| 16.3 Percentage of the city's solid waste that is recycled                                                             | core       | outcome    | Relevant |                                                                      |
| 16.4 Percentage of the city's solid waste that is disposed of in a sanitary landfill                                   | core       | outcome    | Relevant |                                                                      |
| 16.5 Percentage of the city's solid waste that is treated in energy-from-waste plants                                  | core       | outcome    | Relevant |                                                                      |
| 16.6 Percentage of the city's solid waste that is biologically treated and used as compost or biogas                   | supporting | outcome    | Relevant |                                                                      |
| 16.7 Percentage of the city's solid waste that is disposed of in an open dump                                          | supporting | outcome    | Relevant |                                                                      |
| 16.8 Percentage of the city's solid waste that is disposed of by other means                                           | supporting | outcome    | Relevant |                                                                      |
| 16.9 Hazardous waste generation per capita, tonnes                                                                     | supporting | outcome    | Relevant |                                                                      |
| 16.10 Percentage of the city's hazardous waste that is recycled                                                        | supporting | outcome    | Relevant |                                                                      |
| Sports, and Culture                                                                                                    |            |            |          |                                                                      |
| 17.1 Number of cultural institutions and sporting facilities per 100 000 population                                    | core       | capacity   | Relevant |                                                                      |
| 17.2 Percentage of municipal budget allocated to cultural and sporting facilities                                      | supporting | investment | Relevant |                                                                      |
| 17.3 Annual number of cultural events per 100 000 population                                                           | supporting | outcome    | Relevant |                                                                      |
| Telecommunications                                                                                                     |            |            |          |                                                                      |
| 18.1 Number of internet connections per 100 000 population                                                             | supporting | capacity   | Revise   | Number of household connections                                      |
| 18.2 Number of mobile phone connections per 100 000 population                                                         | supporting | outcome    | Relevant |                                                                      |
| Transportation                                                                                                         |            |            |          |                                                                      |
| 19.1 Kilometres of public transport system per 100 000 population                                                      | core       | capacity   | Relevant |                                                                      |
| 19.2 Annual number of public transport trips per capita                                                                | core       | outcome    | Relevant |                                                                      |
| 19.3 Percentage of commuters using a travel mode other than a personal vehicle                                         | supporting | outcome    | Relevant |                                                                      |
| 19.4 Kilometres of bicycle paths and lanes per 100 000 population                                                      | supporting | capacity   | Revise   | Bicycle paths and lands maintained year-round (snow and ice cleared) |
| 19.5 Transportation deaths per 100 000 population                                                                      | supporting | outcome    | Relevant |                                                                      |
| 19.6 Percentage of population living within 0,5 km of public transit running at least every 20 min during peak periods | supporting | capacity   | Relevant |                                                                      |

|                                                                                |            |          |          |                                                                     |
|--------------------------------------------------------------------------------|------------|----------|----------|---------------------------------------------------------------------|
| 19.7 Average commute time                                                      | supporting | outcome  | Relevant |                                                                     |
| 19.8 Number of personal automobiles per capita                                 | supporting | capacity | Relevant |                                                                     |
| 19.9 Number of two-wheeled motorized vehicles per capita                       | supporting | capacity | Low      | Motorcycle transportation less feasible in Arctic winters           |
| <b>Local agriculture and food security</b>                                     |            |          |          |                                                                     |
| 20.1 Total urban agricultural area per 100 000 population                      | core       | capacity | Low      | Agriculture not feasible in large parts of the Arctic               |
| 20.2 Amount of food produced locally as a percentage of total food supplied    | supporting | outcome  | Revise   | Include regional production as “local”                              |
| 20.3 Percentage of city population undernourished                              | supporting | outcome  | Relevant |                                                                     |
| 20.4 Percentage of city population that is overweight or obese Body Mass Index | supporting | outcome  | Relevant |                                                                     |
| <b>Urban planning (land use)</b>                                               |            |          |          |                                                                     |
| 21.1 Green area (hectares) per 100 000 population                              | core       | capacity | Revise   | Define as green area designated and maintained as municipal parks   |
| 21.2 Areal size of informal settlements as a percentage of city area           | supporting | capacity | Revise   | Include areas with tent camps for transient and homeless population |
| 21.3 Jobs housing ratio                                                        | supporting | outcome  | Low      | Problem for Arctic cities hosting shift workers                     |
| 21.4 Basic service proximity                                                   | supporting | capacity | Relevant |                                                                     |
| 21.5.1 Population density                                                      | profile    |          | Revise   | Within settled area (urban boundaries arbitrary)                    |
| 21.5.2 Number of trees per 100 000 population                                  | profile    |          | Relevant | Only relevant if south of tree line                                 |
| 21.5.3 Built-up density                                                        | profile    |          | Revise   | Within settled area (urban boundaries arbitrary)                    |
| <b>Wastewater</b>                                                              |            |          |          |                                                                     |
| 22.1 Percentage of city population served by wastewater collection             | core       | capacity | Relevant |                                                                     |
| 22.2 Percentage of the city's wastewater receiving centralized treatment       | core       | capacity | Relevant |                                                                     |
| 22.3 Percentage of population with access to improved sanitation               | core       | capacity | Relevant |                                                                     |
| 22.4 Compliance rate of wastewater treatment                                   | supporting | outcome  | Relevant |                                                                     |
| <b>Water</b>                                                                   |            |          |          |                                                                     |
| 23.1 Percentage of city population with potable water supply service           | core       | capacity | Relevant |                                                                     |

|                                                                                        |            |          |          |                                                                    |
|----------------------------------------------------------------------------------------|------------|----------|----------|--------------------------------------------------------------------|
| 23.2 Percentage of city population with sustainable access to an improved water source | core       | capacity | Relevant |                                                                    |
| 23.3 Total domestic water consumption per capita, liters/day                           | core       | outcome  | Relevant |                                                                    |
| 23.4 Compliance rate of drinking water quality                                         | core       | capacity | Relevant |                                                                    |
| 23.5 Total water consumption per capita, liters per day                                | supporting | outcome  | Revise   | Measure per capita net energy used by water and wastewater systems |
| 23.6 Average annual hours of water service interruptions per household                 | supporting | capacity | Relevant |                                                                    |
| 23.7 Percentage of water loss                                                          | supporting | capacity | Relevant |                                                                    |

---

**Table S2.** Summary of ISO 37120 Indicator Types, Functions, and Relevance to Arctic Cities.

| Sustainability domain                      | ISO category     |                 |                       | Function type      |                     |                       |                     |                      | Relevance                |                                                                                                     |
|--------------------------------------------|------------------|-----------------|-----------------------|--------------------|---------------------|-----------------------|---------------------|----------------------|--------------------------|-----------------------------------------------------------------------------------------------------|
|                                            | Total indicators | Core indicators | Supporting indicators | Outcome Indicators | Capacity Indicators | Investment indicators | Relevant indicators | Modifications needed | Inappropriate indicators | Suggested new indicators                                                                            |
| <i>Economy</i>                             | 11               | 1               | 7                     | 4                  | 3                   | 1                     | 4                   | 4                    | 3                        | Percentage of regional export industry employment based on non-renewable resources (core indicator) |
| <i>Education</i>                           | 6                | 4               | 2                     |                    | 5                   | 1                     | 6                   |                      |                          |                                                                                                     |
| <i>Energy</i>                              | 9                | 5               | 2                     | 7                  |                     |                       | 5                   | 3                    | 1                        | Solar energy potential (profile indicator)                                                          |
| <i>Environment and Climate Change</i>      | 9                | 3               | 6                     | 6                  |                     | 3                     | 6                   | 2                    | 1                        |                                                                                                     |
| <i>Finance</i>                             | 6                | 2               | 2                     | 1                  | 2                   | 1                     | 6                   |                      |                          | Percentage of municipal revenues derived from non-renewable resources (core indicator)              |
| <i>Governance</i>                          | 4                | 1               | 3                     | 2                  |                     | 2                     | 4                   |                      |                          |                                                                                                     |
| <i>Health</i>                              | 6                | 4               | 2                     | 3                  | 3                   |                       | 6                   |                      |                          |                                                                                                     |
| <i>Housing</i>                             | 10               | 2               | 2                     | 2                  | 2                   |                       | 10                  |                      |                          |                                                                                                     |
| <i>Population and Social Conditions</i>    | 9                | 1               | 2                     | 3                  |                     |                       | 9                   |                      |                          |                                                                                                     |
| <i>Recreation</i>                          | 2                | 0               | 2                     | 2                  |                     |                       | 2                   |                      |                          |                                                                                                     |
| <i>Safety</i>                              | 10               | 6               | 4                     | 7                  | 3                   |                       | 10                  |                      |                          |                                                                                                     |
| <i>Solid Waste</i>                         | 10               | 5               | 5                     | 9                  | 1                   |                       | 10                  |                      |                          |                                                                                                     |
| <i>Sports, and Culture</i>                 | 3                | 1               | 2                     | 1                  | 1                   | 1                     | 3                   |                      |                          |                                                                                                     |
| <i>Telecommunications</i>                  | 2                | 0               | 2                     | 1                  | 1                   |                       | 1                   | 1                    |                          |                                                                                                     |
| <i>Transportation</i>                      | 9                | 2               | 7                     | 4                  | 5                   |                       | 7                   | 1                    | 1                        |                                                                                                     |
| <i>Local agriculture and food security</i> | 4                | 1               | 3                     | 3                  | 1                   |                       | 2                   | 1                    | 1                        |                                                                                                     |



|                                  |     |    |    |    |    |   |     |    |   |                                                                                   |
|----------------------------------|-----|----|----|----|----|---|-----|----|---|-----------------------------------------------------------------------------------|
| <i>Urban planning (land use)</i> | 7   | 1  | 3  | 1  | 3  |   | 2   | 4  | 1 |                                                                                   |
| <i>Wastewater</i>                | 4   | 3  | 1  | 1  | 3  |   | 4   |    |   |                                                                                   |
| <i>Water</i>                     | 7   | 4  | 3  | 2  | 5  |   | 6   | 1  |   | Per capita net energy used by water and wastewater systems (supporting indicator) |
| <b>Total, all domains</b>        | 128 | 46 | 60 | 59 | 38 | 9 | 103 | 17 | 8 |                                                                                   |
